# Supplementary material for: Antimicrobial Susceptibility Profiles among Pseudomonas aeruginosa Isolated from Professional SCUBA Divers with Otitis Externa, Swimming Pools and the Ocean at a Diving Operation in South Africa
Source: MDPI journal article supplement (doi:10.3390/pathogens11010091), 2022-01-13
Supplement: s1 [file s1]

**Table S1.** Zone diameter breakpoints to different classes of antibiotics used in this study based on the CLSI guidelines for *Pseudomonas aeruginosa* [Table 2B-1, 31].

| Antimicrobial class               | Mode of action                                  | Antimicrobial agent           | Interpretive criteria and zone diameter breakpoints to the nearest mm |       |           |
|-----------------------------------|-------------------------------------------------|-------------------------------|-----------------------------------------------------------------------|-------|-----------|
|                                   |                                                 |                               | S                                                                     | I     | R         |
| Penicillins                       | Inhibit cell wall synthesis                     | Penicillin G                  | -                                                                     | -     | -         |
| $\beta$ -lactam                   | Inhibit cell wall synthesis                     | Amoxicillin                   | -                                                                     | -     | -         |
| $\beta$ -lactam combination agent | Inhibit cell wall synthesis                     | Augmentin                     | -                                                                     | -     | -         |
|                                   |                                                 | Piperacillin-tazobactam       | $\geq 21$                                                             | 15–20 | $\leq 14$ |
| Cephems                           | Inhibit cell wall synthesis                     | Cefotaxime                    | -                                                                     | -     | -         |
|                                   |                                                 | Cefaperazone                  | -                                                                     | -     | -         |
|                                   |                                                 | Ceftazidime                   | $\geq 18$                                                             | 15–17 | $\leq 14$ |
| Carbapenem                        | Inhibit cell wall synthesis                     | Meropenem                     | $\geq 19$                                                             | 16–18 | $\leq 15$ |
|                                   |                                                 | Imipenem                      | $\geq 19$                                                             | 16–18 | $\leq 15$ |
| Monobactam                        | Inhibit cell wall synthesis                     | Aztreonam                     | $\geq 22$                                                             | 16–21 | $\leq 15$ |
| Aminoglycosides                   | Inhibit protein synthesis                       | Amikacin                      | $\geq 17$                                                             | 15–16 | $\leq 14$ |
|                                   |                                                 | Neomycin                      | -                                                                     | -     | -         |
| Fluoroquinolones                  | Inhibit bacterial DNA synthesis and replication | Ciprofloxacin                 | $\geq 25$                                                             | 19–24 | $\leq 18$ |
|                                   |                                                 | Ofloxacin                     | $\geq 16$                                                             | 13–15 | $\leq 12$ |
| Lipopeptides                      | Disruption of cell wall integrity               | Polymyxin B                   | -                                                                     | -     | -         |
| Folate pathway antagonists        | Inhibit folate action                           | Trimethoprim-sulfamethoxazole | -                                                                     | -     | -         |

S: Susceptible, I: Intermediate, R: Resistance; -: zone diameter breakpoints not available, results were interpreted based on zone diameter breakpoints for antimicrobial agents belonging to the same class.
